# Supplementary material for: Effects of Amyloid Light-Chain Amyloidosis on Clinical Characteristics and Prognosis in Multiple Myeloma: A Single-Center Retrospective Study
Source: Research Square preprint supplement (doi:10.21203/rs.3.rs-88885/v1), 2020-10-13
Supplement: Supplementary file 1 [file 2e8fd9e3a707a92d0b78cc7b.xlsx]

## Sheet: Sheet1
Table 4: Causes of death in all patients with multiple myeloma accompanied by AL amyloidosis
	Number of deaths	*Proportion
Cardiac amyloidosis	13	0.6841
Gastrointestinal bleeding (gastrointestinal involvement)	2	0.1053
Renal failure (renal amyloidosis)	2	0.1053
Multiple myeloma related deaths	2	0.1053
Unknown causes of death	12
Deaths	31
*Proportion: proportion of known causes of death.
